# Supplementary material
Source: PubMed Central journal article supplement (PMC404059)
Supplement: pnas_101_17_6415__5.pdf [file pnas_101_17_6415__5.pdf]

1 5 10 15 20 25#

MMITL**KK**LPLAVAVAAGVMSAQAMA

MMITL**KK**LPLAVAVAAGVMSAQ**DMY**

MMITL**LK**LPLAVAVAAGVMSAQ**DMY**

\*\*\*\*\*

wt

A23D A25Y

A23D A25Y R6L
