# Supplementary material
Source: PubMed Central journal article supplement (PMC404059)

**NaN<sub>3</sub>**

**+**

**-**

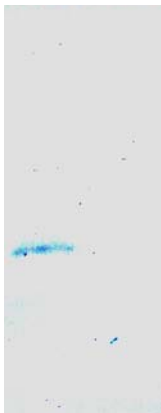

Supplement: pnas_101_17_6415__1.pdf [file pnas_101_17_6415__1.pdf]

**A**

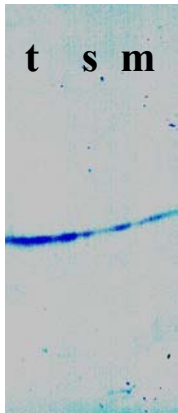

**B**

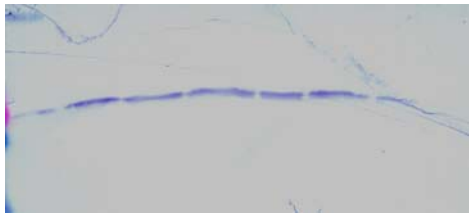

**1 2 3 4 5 6 7 8**

Supplement: pnas_101_17_6415__2.pdf [file pnas_101_17_6415__2.pdf]

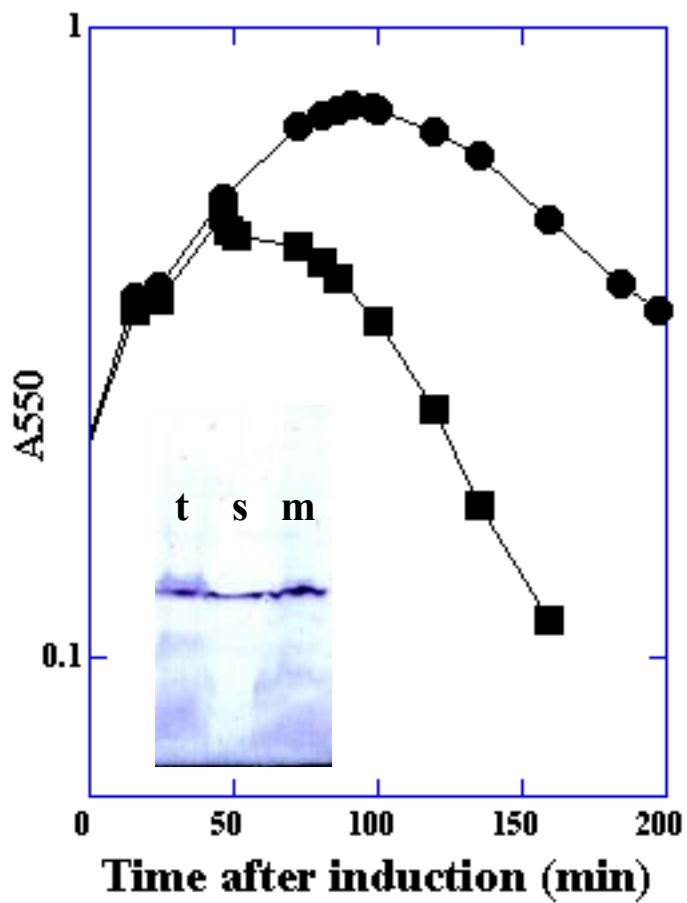

Supplement: pnas_101_17_6415__4.pdf [file pnas_101_17_6415__4.pdf]
